# Supplementary figures and images for: Bromodomain Proteins Contribute to Maintenance of Bloodstream Form Stage Identity in the African Trypanosome
Source: PLOS journal article supplement (doi:10.1371/journal.pbio.1002316), 2015-12-08

# 6B

Forward/Side Scatter

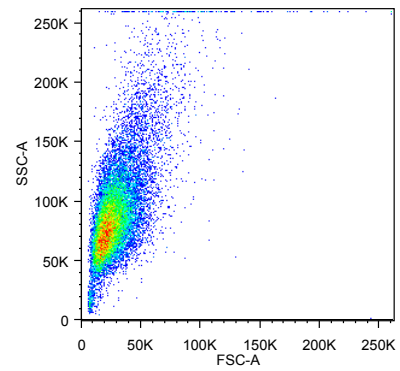

Final

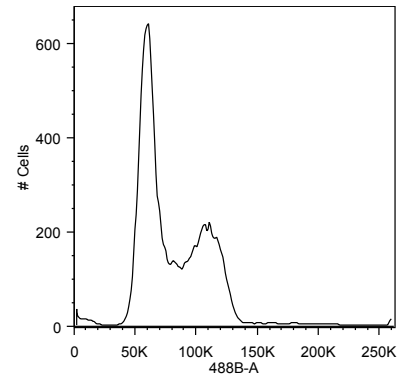

Supplement: S6 (10.1371/journal.pbio.1002316.s006) [file journal.pbio.1002316.s006]
